# Supplementary material for: Stimulation of immune systems by conjugated polymers and their potential as an alternative vaccine adjuvant
Source: Royal Society of Chemistry journal article supplement (doi:10.1039/c5nr06081h), 2015-01-01
Supplement: c5nr06081h1.pdf [file c5nr06081h1.pdf]

## Supporting information

### Stimulation of immune systems by conjugated polymers and their potential as an alternative vaccine adjuvant

Hua Gong, Jian Xiang, Ligeng Xu\*, Xuejiao Song, Ziliang Dong, Rui Peng\*, Zhuang Liu\*

Institute of Functional Nano & Soft Materials (FUNSOM), Collaborative Innovation Center of Suzhou Nano Science and Technology, Soochow University, Suzhou, Jiangsu, 215123, China

E-mail: [lgxu@suda.edu.cn](mailto:lgxu@suda.edu.cn), [rpeng@suda.edu.cn](mailto:rpeng@suda.edu.cn), [zliu@suda.edu.cn](mailto:zliu@suda.edu.cn)

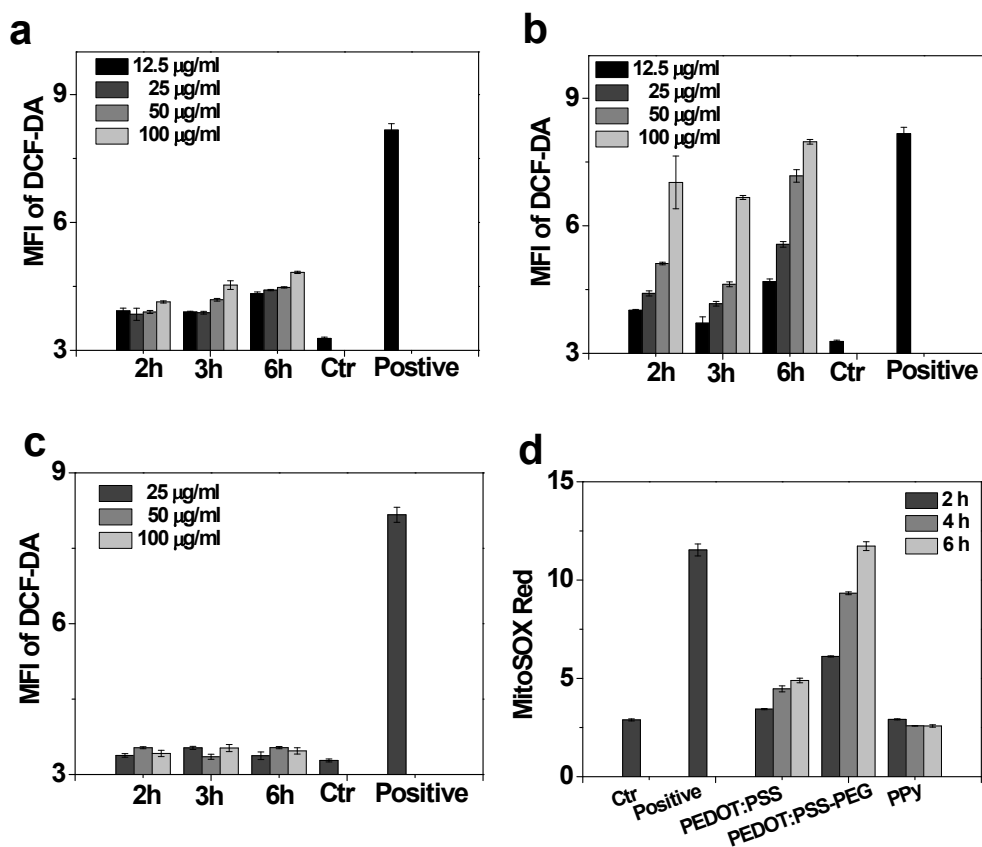

**Figure S1.** Intracellular generation of ROS detected by DCF-DA and MitoSox red. (a-c) RAW 264.7 cells treated with PEDOT:PSS (a), PEDOT:PSS-PEG (b), and PPy (c) at various concentrations and time points, the intracellular ROS was measured by DCF-DA, which is a sensitive dye for  $\text{H}_2\text{O}_2$ . (d) Intracellular generation of ROS detected by MitoSox red, which is a sensitive dye for  $\text{O}_2^-$  radicals.

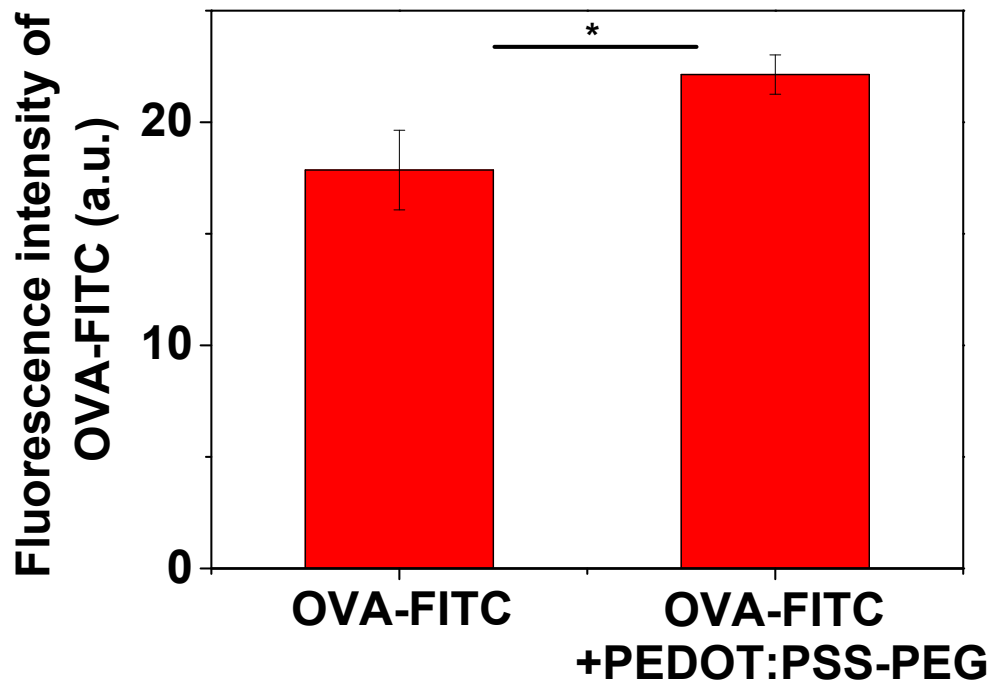

**Figure S2.** Comparison of OVA uptake efficiency after treating bone marrow derived dendritic cells with free OVA-FITC and the mixture of OVA-FITC and PEDOT:PSS-PEG.

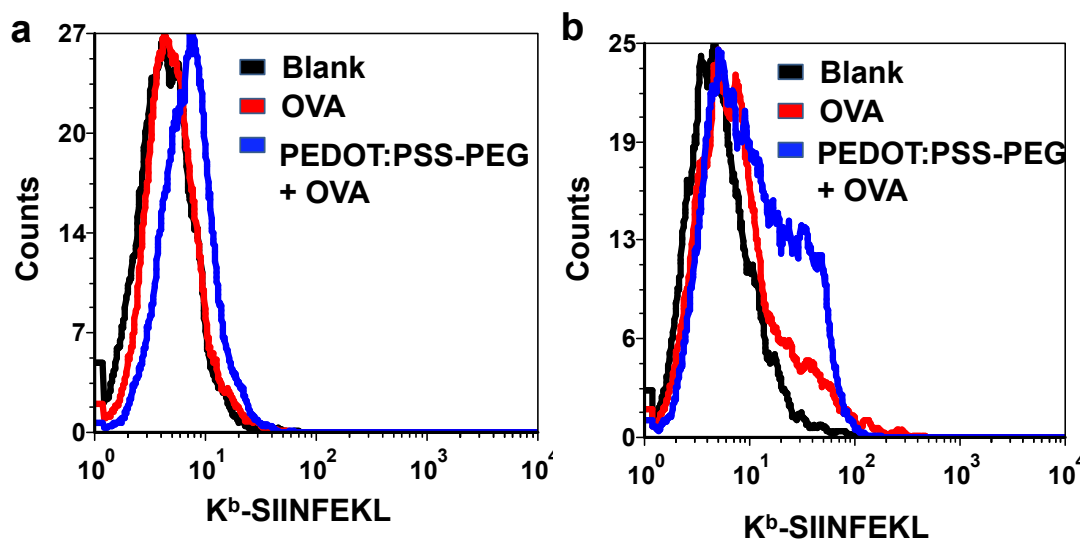

**Figure S3.** Representative histograms of cross presentation of OVA antigen by using anti-K<sup>b</sup>-SIINFEKL-PE antibodies after treating dendritic cells with various materials for 24 hours (a) and 48 hours (b).
